# Supplementary material for: Structural Variations in Biobased Polyfurfuryl Alcohol Induced by Polymerization in Water
Source: MDPI journal article supplement (doi:10.3390/polym15071745), 2023-03-31
Supplement: s1 [file s1]

**Table S1.** Data obtained from the C=O quantification, enthalpies from DSC and the calculated conversion degrees.

| C=O content     | $\Delta H$ (J/g) | Conversion degree |
|-----------------|------------------|-------------------|
| $0.19 \pm 0.05$ | 610              | 0.00              |
| $1.45 \pm 0.17$ | 470              | 0.23              |
| $1.75 \pm 0.15$ | 275              | 0.55              |
| $2.00 \pm 0.18$ | 145              | 0.76              |

**Figure S1.** Magnified HSQC spectra of PFA+ (blue) and PFA° (red) of the CH<sub>3</sub> area. The blue spectrum is stacked on top of the red one.

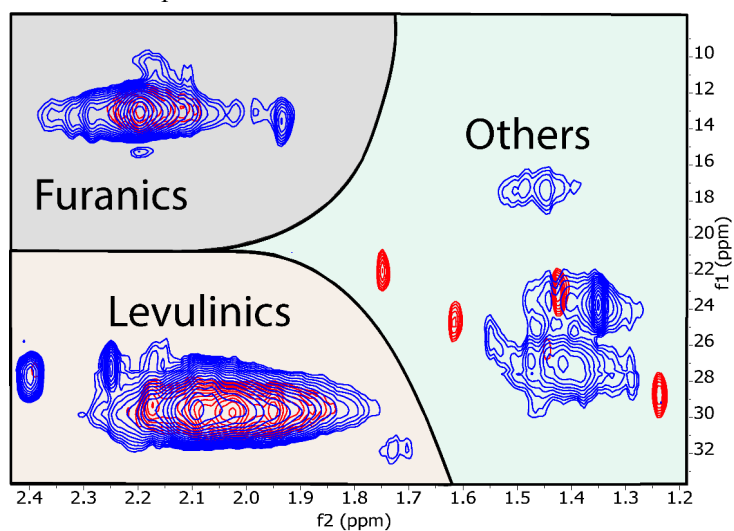

**Figure S2.** HMBC spectra of PFA° (red) and PFA+ (blue) focusing on the methyls. The red spectrum is on top of the blue one

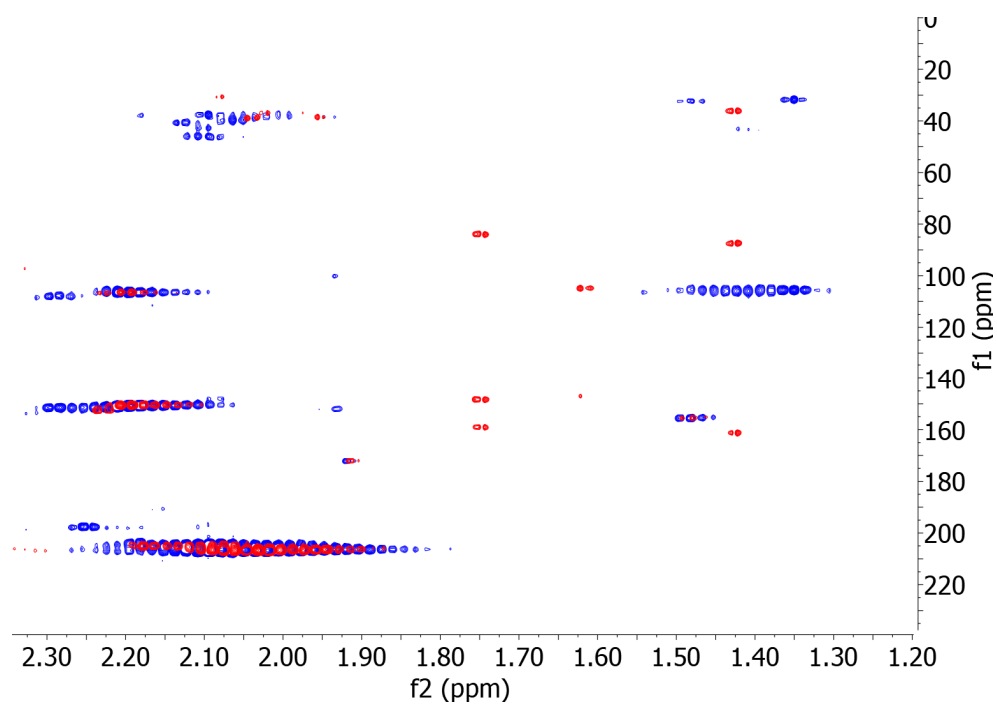

**Figure S3.** Magnified HSQC spectra of PFA<sup>+</sup> (blue) and PFA<sup>°</sup> (red) of the CH<sub>2</sub> area. The blue spectrum is stacked on top of the red one

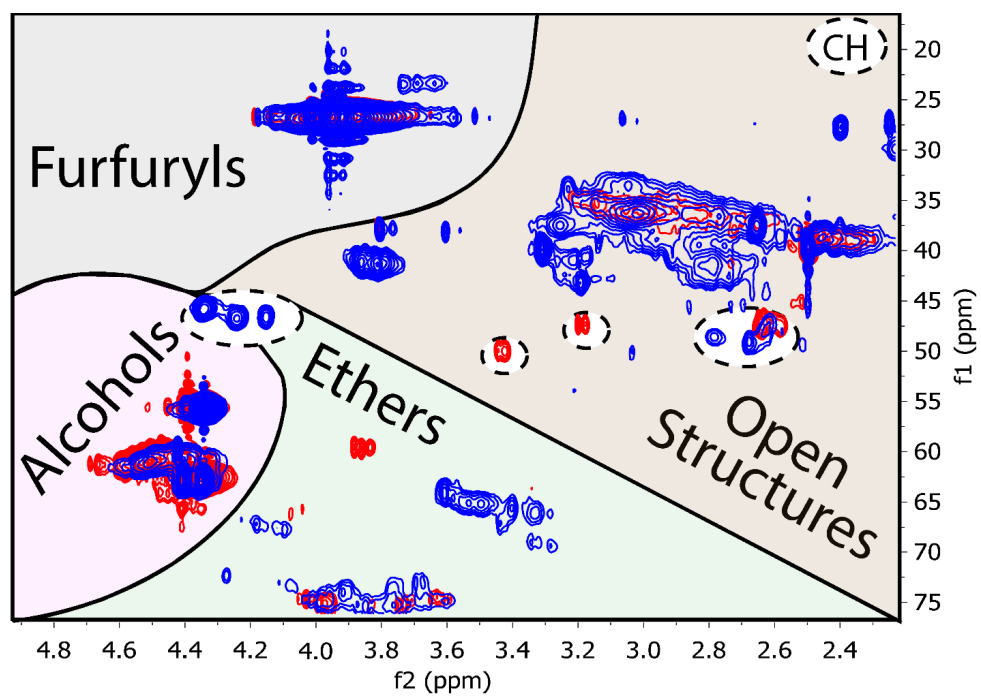

**Figure S4.** Magnified HSQC spectra of PFA+ (blue) and PFA° (red) of the dienes and ethers areas. The blue spectrum is stacked on top of the red one

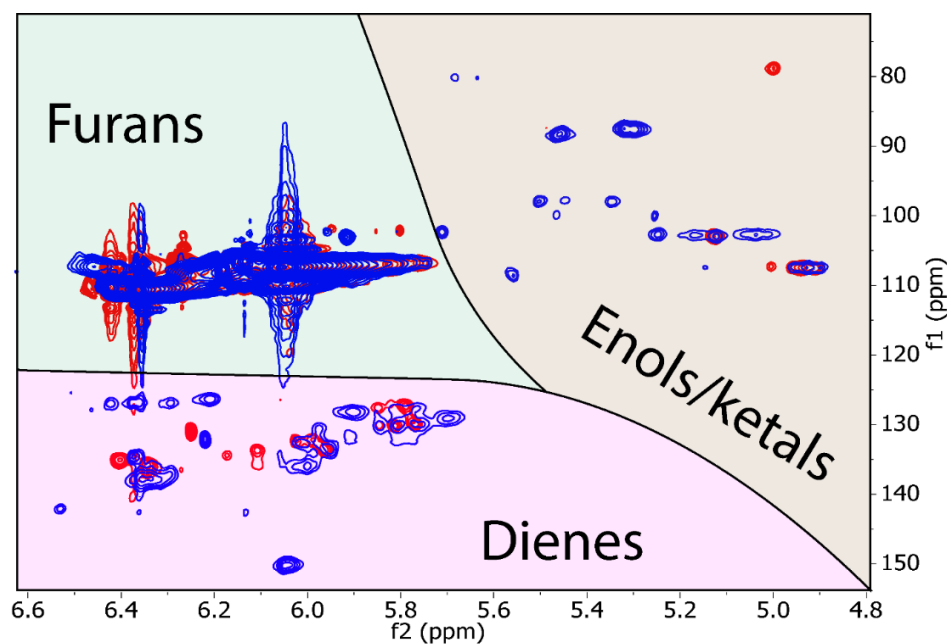

**Figure S5.** Magnified HSQC spectra of PFA+ (blue) and PFA° (red) of the aldehyde area. The blue spectrum is stacked on top of the red one

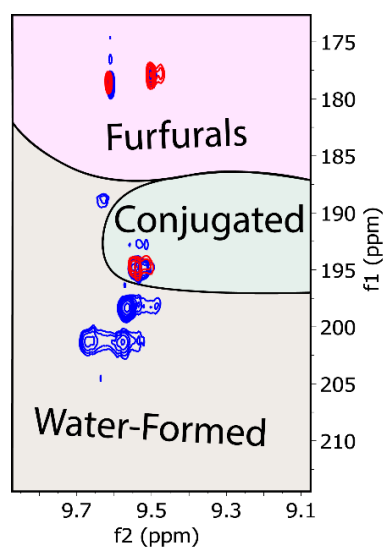

**Table S2.**  $^1\text{H}$  and  $^{13}\text{C}$  NMR predicted chemical shift of a furfuryl lactone unit

| N° | $\delta$ ( $^1\text{H}$ , ppm) | $\delta$ ( $^{13}\text{C}$ , ppm) |
|----|--------------------------------|-----------------------------------|
| 1  | 6.04                           | 110.1                             |
| 2  | /                              | 153.4                             |
| 3  | 3.35                           | 29.2                              |
| 4  | /                              | 93.4                              |
| 5  | 1.52                           | 23.3                              |
| 6  | 7.31                           | 160.4                             |
| 7  | 6.72                           | 120                               |
| 8  | 7                              | 172.5                             |

**Table S3** Peak/structures assignments of the MALDI ToF spectra for PFA<sup>+</sup> and PFA<sup>o</sup>

152 Da =

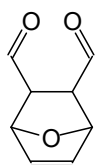

157 Da =

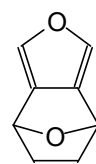

161 Da =

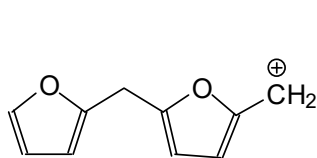

AND/OR

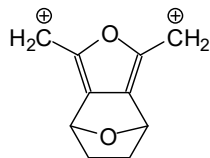

176 Da =

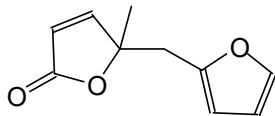

AND/OR

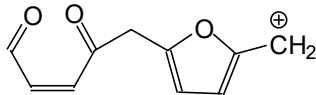

190 Da =

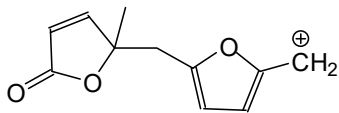

AND/OR

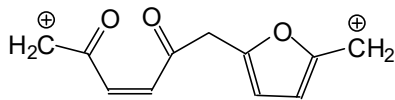

194 Da =

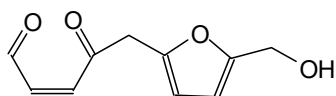

197-198 = no Na<sup>+</sup>, deprotonated

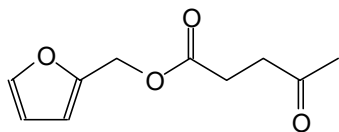

226 Da = no Na<sup>+</sup>, deprotonated

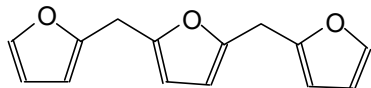

240-241 Da = no Na<sup>+</sup>, more present in PFA<sup>+</sup>

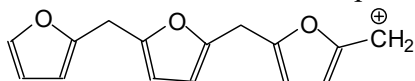

257 Da = protonated no Na<sup>+</sup> (in PFA<sup>+</sup>), and **281 Da, with Na<sup>+</sup>** in both PFA<sup>+</sup> and PFA<sup>°</sup>. But more pronounced in PFA<sup>+</sup> than in PFA<sup>°</sup>

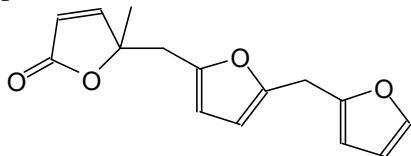

308 Da = no Na<sup>+</sup>

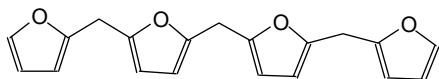

310 Da = no Na<sup>+</sup>, calc. 310 Da, and **334-335 Da**, with Na<sup>+</sup>

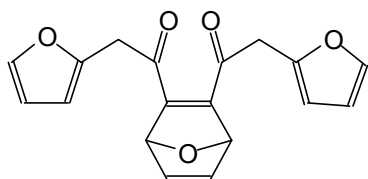

318.6 Da = with Na<sup>+</sup>, protonated

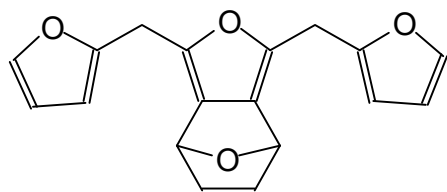

326-327 Da = no Na<sup>+</sup> (both in PFA<sup>°</sup> and PFA<sup>+</sup>), and 350 Da with Na<sup>+</sup> on in PFA<sup>°</sup> (small). Example of open structure of polyfurans

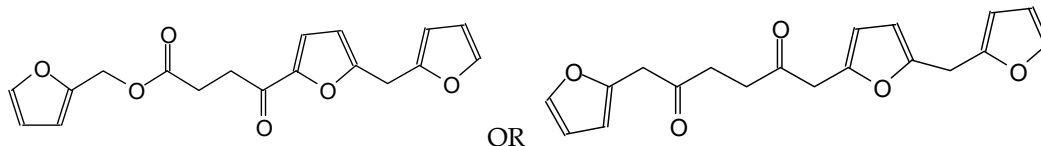

335 Da = with Na<sup>+</sup>, calc 321 Da, showing more open forms in PFA<sup>+</sup>

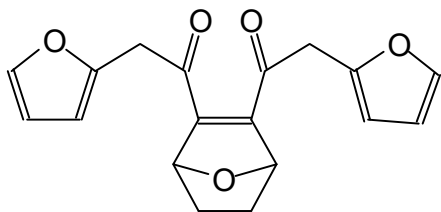

336-338 Da = no Na<sup>+</sup>, Calc. 337 deprotonated, 338 Da normal more present in PFA<sup>+</sup>, and **361 Da with Na<sup>+</sup>**

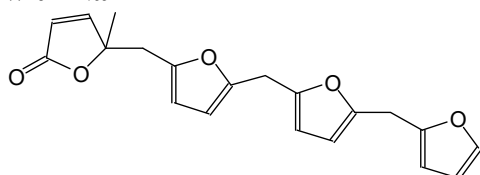

404 Da = no Na<sup>+</sup>, and 428 Da with Na<sup>+</sup>, and example of an end-chain conjugated aldehyde resulting from the oxidative ring-opening of furans in PFA resins. It is present on PFA<sup>+</sup> but not really distinguishable in PFA<sup>°</sup>.

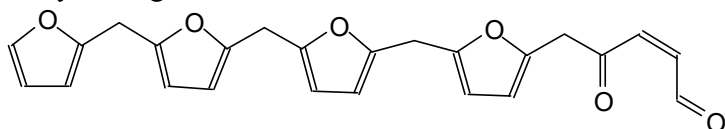

456 Da = no Na<sup>+</sup>, protonated, calc. 455 Da; **476-478 Da with Na<sup>+</sup>**, calculated 477 Da

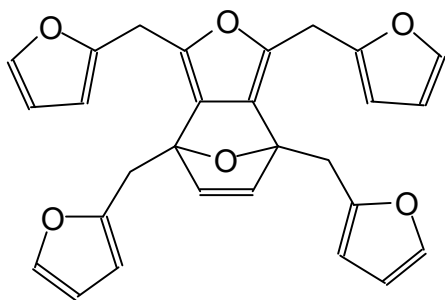

It shows that there are several more forms of this structure in PFA<sup>+</sup>.

All the above indicates that the open ketones forms predominates even in the Diels Alder structures.

470 Da = no Na<sup>+</sup>, and 493 Da with Na<sup>+</sup>

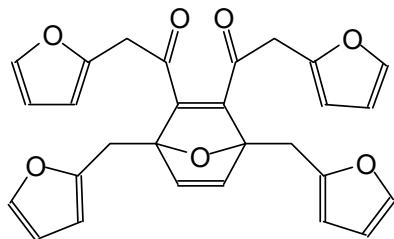

**AND OR**

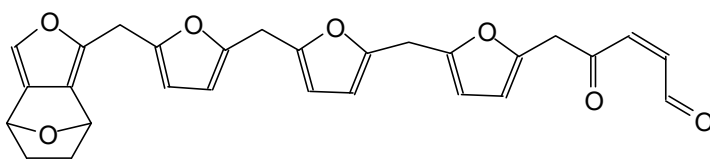

481-483 Da = no Na<sup>+</sup>, in PFA<sup>°</sup>

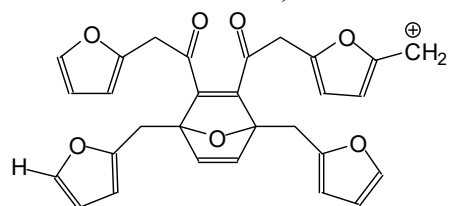

496 Da = no Na<sup>+</sup> in both PFA<sup>°</sup> and PFA<sup>+</sup>, but more marked in PFA<sup>°</sup>

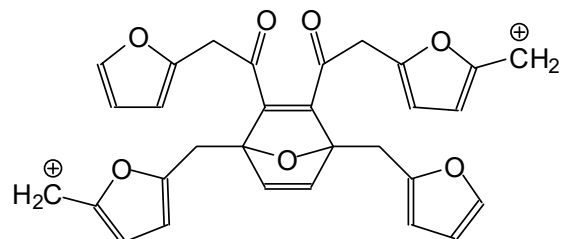

574-575 Da = with Na<sup>+</sup>,

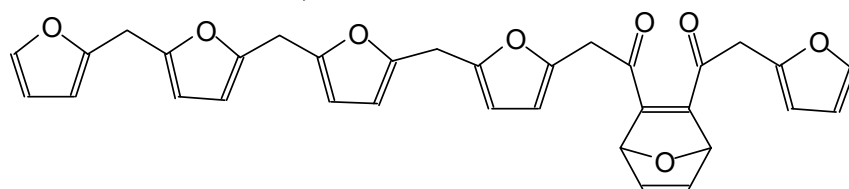

**AND /OR**

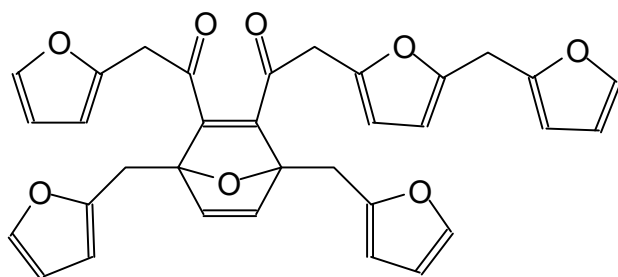

**It is unnecessary to calculate and assigned higher oligomers structures as several isomer structures become possible.**

---
